# Supplementary material for: Reaction kinetics of hydrogen addition reactions to methyl butenoate
Source: Royal Society of Chemistry journal article supplement (doi:10.1039/c9cp06570a), 2020-01-01
Supplement: c9cp06570a1.pdf [file c9cp06570a1.pdf]

## Supporting Information

### Reaction kinetics of hydrogen addition reactions to methyl butenoate

Yage Gao,<sup>ab</sup> Xiaoyu Li,<sup>ab</sup> and Xiaoqing You\*<sup>ab</sup>

<sup>a</sup> Center for Combustion Energy, Tsinghua University, Beijing 100084, China

<sup>b</sup> Key Laboratory for Thermal Science and Power Engineering of the Ministry of  
Education, Tsinghua University, Beijing 100084, China

#### **Corresponding Author:**

Xiaoqing You

Center for Combustion Energy

Tsinghua University, Beijing 100084, China

Phone: +86-10-62771854

E-mail: [xiaoqing.you@tsinghua.edu.cn](mailto:xiaoqing.you@tsinghua.edu.cn)

**Table S1** The barrier heights (the zero point energy included,  $\Delta E_f$ : forward barrier height,  $\Delta E_r$ : backward barrier height) and enthalpies of reaction at 0 K ( $\Delta H_r$ ) of hydrogen addition reactions computed by various quantum chemical methods. Single point calculations were carried out based on the lowest-energy-structures optimized at the M08-HX/MG3S level of theory, and zero point energies (ZPEs) were calculated using scaled harmonic frequencies with a scale factor of 0.973.<sup>a</sup> (in kcal/mol)

a) Methyl 3-butenolate

|                          | R <sub>1,1</sub> |              |              | R <sub>2,1</sub> |              |              | R <sub>3,1</sub> |              |              | R <sub>4,1</sub> |              |              | MUD <sup>b</sup> |
|--------------------------|------------------|--------------|--------------|------------------|--------------|--------------|------------------|--------------|--------------|------------------|--------------|--------------|------------------|
|                          | $\Delta H_r$     | $\Delta E_f$ | $\Delta E_r$ | $\Delta H_r$     | $\Delta E_f$ | $\Delta E_r$ | $\Delta H_r$     | $\Delta E_f$ | $\Delta E_r$ | $\Delta H_r$     | $\Delta E_f$ | $\Delta E_r$ |                  |
| CCSD(T)-F12a/jun-cc-pVTZ | -6.7             | 13.8         | 20.5         | 0.7              | 11.1         | 10.4         | -33.5            | 4.0          | 37.5         | -36.1            | 2.5          | 38.6         |                  |
| M06-2x/ma-TZVP           | -0.6             | -0.6         | 0.1          | -0.7             | -0.4         | 0.3          | 0.0              | 1.0          | 1.0          | -0.4             | 0.9          | 1.3          | 0.6              |
| MN15/ma-TZVP             | -1.3             | -1.7         | -0.4         | -0.6             | -0.6         | 0.0          | 0.2              | 0.7          | 0.5          | -0.6             | 0.5          | 1.1          | 0.7              |
| MN12-L/MG3S              | -0.2             | -1.1         | -0.9         | -0.9             | -0.7         | 0.2          | 0.6              | 0.9          | 0.3          | -1.1             | 0.4          | 1.4          | 0.7              |
| MN15/MG3S                | -1.6             | -1.4         | 0.3          | -0.6             | -0.8         | -0.2         | 0.2              | 0.8          | 0.6          | -0.6             | 0.5          | 1.1          | 0.7              |
| MN12-SX/ma-TZVP          | -0.8             | -0.7         | 0.1          | -2.0             | -1.5         | 0.5          | 0.1              | -0.1         | -0.2         | -1.4             | -0.6         | 0.8          | 0.7              |
| M08-HX/ma-TZVP           | -0.8             | -0.6         | 0.2          | -0.3             | -0.8         | -0.4         | -0.8             | 0.7          | 1.5          | -1.2             | 0.5          | 1.7          | 0.8              |
| M06-2X/MG3S              | -1.1             | -0.2         | 0.9          | -1.1             | -0.6         | 0.5          | -0.2             | 1.0          | 1.3          | -0.7             | 1.0          | 1.6          | 0.8              |
| MN12-SX/MG3S             | -1.5             | -0.6         | 0.9          | -1.9             | -1.9         | 0.0          | -0.3             | -0.4         | -0.1         | -1.5             | -0.8         | 0.7          | 0.9              |
| MN12-L/ma-TZVP           | 0.3              | -1.3         | -1.7         | -1.0             | -0.4         | 0.6          | 0.8              | 1.1          | 0.4          | -1.1             | 0.5          | 1.6          | 0.9              |
| M08-SO/ma-TZVP           | -0.1             | -0.1         | 0.1          | -0.9             | -0.8         | 0.2          | -1.4             | 0.7          | 2.1          | -2.2             | 0.4          | 2.7          | 1.0              |
| SOGGA11-X/MG3S           | 0.7              | 0.4          | -0.2         | -2.4             | 0.4          | 2.9          | -0.5             | 0.5          | 1.0          | -1.5             | -0.1         | 1.4          | 1.0              |
| M11/ma-TZVP              | -1.7             | -1.3         | 0.4          | 0.8              | -0.9         | -1.6         | -0.8             | 0.0          | 0.9          | -2.0             | -0.2         | 1.7          | 1.0              |
| M08-HX/MG3S              | -1.5             | -0.5         | 1.1          | -0.8             | -1.1         | -0.3         | -1.2             | 0.6          | 1.8          | -1.6             | 0.4          | 2.0          | 1.1              |
| M08-SO/MG3S              | -1.0             | -0.2         | 0.8          | -1.1             | -1.0         | 0.1          | -1.5             | 0.6          | 2.1          | -2.3             | 0.4          | 2.6          | 1.1              |
| SOGGA11-X/ma-TZVP        | 1.6              | 0.5          | -1.1         | -2.3             | 0.7          | 3.0          | -0.4             | 0.6          | 1.0          | -1.5             | 0.0          | 1.4          | 1.2              |
| M11/MG3S                 | -2.8             | -1.4         | 1.4          | 0.0              | -1.0         | -1.0         | -1.4             | 0.0          | 1.4          | -2.4             | -0.2         | 2.1          | 1.3              |
| PWB6K/ma-TZVP            | -0.2             | 0.4          | 0.6          | -2.7             | 0.6          | 3.3          | -1.1             | 0.5          | 1.7          | -2.1             | 0.0          | 2.1          | 1.3              |
| MN15-L/MG3S              | 2.6              | 0.0          | -2.5         | 1.3              | -0.9         | -2.3         | -0.7             | 0.9          | 1.5          | -1.4             | 0.5          | 1.9          | 1.4              |
| M06/MG3S                 | 1.4              | 0.8          | -0.6         | 0.8              | 1.0          | 0.2          | -1.7             | 0.9          | 2.5          | -3.0             | 0.7          | 3.7          | 1.4              |
| PWB6K/MG3S               | -0.7             | 0.5          | 1.3          | -2.8             | 0.5          | 3.3          | -1.3             | 0.6          | 1.8          | -2.2             | 0.1          | 2.3          | 1.5              |
| MN15-L/ma-TZVP           | 3.1              | -0.5         | -3.6         | 1.2              | -0.7         | -1.8         | -0.6             | 0.9          | 1.5          | -1.4             | 0.5          | 1.9          | 1.5              |
| M05-2X/ma-TZVP           | -0.8             | 1.1          | 1.9          | -1.5             | 1.2          | 2.7          | -0.4             | 1.8          | 2.2          | -0.7             | 1.7          | 2.4          | 1.5              |
| M11-L/ma-TZVP            | 0.3              | -2.8         | -3.1         | 0.5              | 0.2          | -0.3         | -0.1             | 1.9          | 2.0          | -2.5             | 1.3          | 3.8          | 1.6              |
| $\omega$ B97XD/ma-TZVP   | 0.2              | 0.5          | 0.3          | -1.5             | 1.0          | 2.5          | -1.6             | 1.4          | 3.0          | -2.5             | 0.9          | 3.4          | 1.6              |
| M11-L/MG3S               | -0.7             | -2.9         | -2.3         | 0.3              | -0.2         | -0.4         | -0.8             | 1.6          | 2.4          | -3.2             | 1.0          | 4.2          | 1.7              |
| M06/ma-TZVP              | 2.4              | 0.8          | -1.5         | 0.7              | 1.3          | 0.6          | -1.5             | 1.1          | 2.5          | -3.1             | 0.8          | 3.9          | 1.7              |
| $\omega$ B97XD/MG3S      | -0.4             | 0.6          | 1.0          | -1.6             | 0.9          | 2.5          | -1.8             | 1.4          | 3.2          | -2.6             | 1.0          | 3.6          | 1.7              |
| B3LYP/MG3S               | -1.0             | -4.5         | -3.5         | -2.7             | -2.0         | 0.8          | -0.8             | -1.6         | -0.8         | -2.0             | -2.2         | -0.2         | 1.8              |
| B3LYP/ma-TZVP            | -0.5             | -4.6         | -4.2         | -2.6             | -1.9         | 0.8          | -0.7             | -1.7         | -1.0         | -1.9             | -2.3         | -0.4         | 1.9              |
| M05-2X/MG3S              | -1.4             | 1.6          | 3.0          | -2.0             | 1.0          | 3.0          | -0.7             | 2.0          | 2.6          | -0.9             | 1.9          | 2.8          | 1.9              |
| $\omega$ B97X/ma-TZVP    | 0.6              | 2.6          | 1.9          | -1.6             | 2.4          | 4.0          | -2.0             | 2.6          | 4.6          | -3.0             | 2.1          | 5.1          | 2.7              |
| $\omega$ B97X/MG3S       | -0.1             | 2.7          | 2.8          | -1.7             | 2.3          | 4.0          | -2.2             | 2.6          | 4.8          | -3.1             | 2.2          | 5.3          | 2.8              |
| $\omega$ B97/ma-TZVP     | 1.2              | 4.2          | 3.1          | -1.5             | 3.7          | 5.1          | -2.7             | 3.6          | 6.3          | -3.5             | 3.1          | 6.7          | 3.7              |
| $\omega$ B97/MG3S        | 0.4              | 4.3          | 3.9          | -1.6             | 3.4          | 5.1          | -2.9             | 3.6          | 6.4          | -3.6             | 3.1          | 6.8          | 3.7              |

b) Methyl 2-butenate

|                          | R <sub>5,1</sub> |              |              | R <sub>6,1</sub> |              |              | R <sub>7,1</sub> |              |              | R <sub>8,1</sub> |              |              | MUD <sup>b</sup> | MMUD <sup>c</sup> |
|--------------------------|------------------|--------------|--------------|------------------|--------------|--------------|------------------|--------------|--------------|------------------|--------------|--------------|------------------|-------------------|
|                          | $\Delta H_r$     | $\Delta E_f$ | $\Delta E_r$ | $\Delta H_r$     | $\Delta E_f$ | $\Delta E_r$ | $\Delta H_r$     | $\Delta E_f$ | $\Delta E_r$ | $\Delta H_r$     | $\Delta E_f$ | $\Delta E_r$ |                  |                   |
| CCSD(T)-F12a/jun-cc-pVTZ | -17.6            | 12.0         | 29.6         | 4.3              | 12.4         | 8.1          | -33.5            | 3.6          | 37.1         | -37.7            | 3.2          | 40.9         |                  |                   |
| M06-2X/ma-TZVP           | -1.6             | -0.8         | 0.8          | -0.9             | -0.4         | 0.4          | -0.3             | 0.4          | 0.7          | -0.4             | 0.6          | 1.0          | 0.7              | 0.7               |
| SOGGA11-X/ma-TZVP        | 0.0              | 0.2          | 0.2          | -1.6             | 0.3          | 1.9          | -0.4             | 1.0          | 1.4          | -0.4             | 0.8          | 1.2          | 0.8              | 1.0               |
| MN15/ma-TZVP             | -3.4             | -1.7         | 1.6          | -0.7             | -0.7         | 0.0          | 0.0              | 0.4          | 0.4          | -0.3             | 0.3          | 0.5          | 0.8              | 0.8               |
| MN15-L/MG3S              | 0.4              | -0.6         | -1.1         | 1.8              | -1.0         | -2.8         | 0.3              | 0.3          | 0.1          | -0.8             | 0.1          | 1.0          | 0.9              | 1.1               |
| M08-HX/ma-TZVP           | -2.2             | -0.7         | 1.5          | -0.6             | -0.9         | -0.4         | -0.9             | 0.3          | 1.2          | -0.5             | 0.4          | 0.9          | 0.9              | 0.8               |
| SOGGA11-X/MG3S           | -0.8             | 0.2          | 1.0          | -1.8             | 0.0          | 1.8          | -0.5             | 0.8          | 1.3          | -0.5             | 0.6          | 1.1          | 0.9              | 0.9               |
| MN12-L/ma-TZVP           | -3.1             | -2.0         | 1.2          | -0.4             | -0.7         | -0.3         | 1.2              | 1.0          | -0.3         | 0.6              | 0.6          | 0.0          | 0.9              | 0.9               |
| MN15/MG3S                | -3.9             | -1.5         | 2.4          | -0.7             | -0.9         | -0.3         | 0.1              | 0.4          | 0.3          | -0.3             | 0.3          | 0.6          | 1.0              | 0.8               |
| MN15-L/ma-TZVP           | 0.9              | -1.1         | -2.0         | 1.6              | -0.8         | -2.4         | 0.3              | 0.4          | 0.1          | -0.7             | 0.3          | 1.0          | 1.0              | 1.2               |
| M06-2X/MG3S              | -2.3             | -0.5         | 1.8          | -1.3             | -0.6         | 0.7          | -0.5             | 0.5          | 0.9          | -0.7             | 0.6          | 1.3          | 1.0              | 0.9               |
| MN12-L/MG3S              | -3.4             | -1.8         | 1.6          | -0.3             | -1.0         | -0.7         | 1.1              | 0.6          | -0.5         | 0.4              | 0.2          | -0.2         | 1.0              | 0.9               |
| MN12-SX/ma-TZVP          | -3.4             | -1.4         | 2.0          | -1.7             | -1.5         | 0.2          | -0.2             | -0.4         | -0.2         | -0.2             | -0.8         | -0.6         | 1.0              | 0.9               |
| M08-HX/MG3S              | -2.9             | -0.7         | 2.3          | -1.0             | -1.2         | -0.2         | -1.2             | 0.1          | 1.3          | -0.9             | 0.2          | 1.1          | 1.1              | 1.1               |
| M08-SO/ma-TZVP           | -1.8             | -0.3         | 1.6          | -1.0             | -0.9         | 0.1          | -2.0             | 0.3          | 2.3          | -1.9             | 0.1          | 2.1          | 1.2              | 1.1               |
| MN12-SX/MG3S             | -3.9             | -1.3         | 2.6          | -1.6             | -1.9         | -0.4         | -0.5             | -0.7         | -0.3         | -0.4             | -1.2         | -0.7         | 1.3              | 1.1               |
| M08-SO/MG3S              | -2.7             | -0.4         | 2.3          | -1.0             | -1.1         | -0.1         | -2.0             | 0.2          | 2.2          | -2.1             | 0.0          | 2.1          | 1.3              | 1.2               |
| M06/ma-TZVP              | -1.0             | 0.5          | 1.5          | 1.1              | 0.7          | -0.5         | -1.8             | 1.1          | 2.9          | -1.5             | 1.2          | 2.6          | 1.4              | 1.5               |
| M11/ma-TZVP              | -3.4             | -1.3         | 2.1          | 0.6              | -1.1         | -1.7         | -1.8             | -0.6         | 1.2          | -1.4             | -0.1         | 1.2          | 1.4              | 1.2               |
| M11-L/ma-TZVP            | -2.0             | -2.8         | -0.8         | 1.1              | -0.6         | -1.7         | -0.8             | 1.6          | 2.4          | 0.1              | 1.8          | 1.6          | 1.4              | 1.5               |
| M06/MG3S                 | -1.7             | 0.5          | 2.2          | 1.4              | 0.3          | -1.0         | -1.8             | 0.9          | 2.7          | -1.6             | 0.9          | 2.5          | 1.4              | 1.4               |
| PWB6K/ma-TZVP            | -2.2             | 0.2          | 2.4          | -2.5             | 0.4          | 2.8          | -1.3             | 0.5          | 1.8          | -1.1             | 0.5          | 1.6          | 1.5              | 1.4               |
| B3LYP/MG3S               | -2.0             | -4.4         | -2.4         | -1.9             | -2.7         | -0.9         | -0.7             | -1.0         | -0.3         | -0.9             | -1.2         | -0.4         | 1.6              | 1.7               |
| M11-L/MG3S               | -2.7             | -3.0         | -0.3         | 0.9              | -1.0         | -1.9         | -1.5             | 1.1          | 2.7          | -0.6             | 1.4          | 2.0          | 1.6              | 1.6               |
| B3LYP/ma-TZVP            | -1.4             | -4.5         | -3.1         | -1.7             | -2.6         | -0.9         | -0.7             | -1.1         | -0.5         | -0.8             | -1.3         | -0.5         | 1.6              | 1.7               |
| PWB6K/MG3S               | -2.8             | 0.3          | 3.0          | -2.6             | 0.2          | 2.8          | -1.4             | 0.5          | 1.9          | -1.3             | 0.5          | 1.8          | 1.6              | 1.5               |
| M11/MG3S                 | -4.5             | -1.5         | 3.0          | -0.3             | -1.3         | -1.0         | -2.2             | -0.7         | 1.5          | -1.9             | -0.2         | 1.6          | 1.6              | 1.5               |
| ωB97XD/ma-TZVP           | -1.7             | 0.5          | 2.2          | -1.2             | 0.5          | 1.7          | -2.0             | 1.5          | 3.5          | -2.1             | 1.6          | 3.6          | 1.8              | 1.7               |
| M05-2X/ma-TZVP           | -2.5             | 1.2          | 3.7          | -1.5             | 0.8          | 2.3          | -0.7             | 1.5          | 2.2          | -1.3             | 1.9          | 3.3          | 1.9              | 1.7               |
| ωB97XD/MG3S              | -2.3             | 0.5          | 2.8          | -1.3             | 0.3          | 1.6          | -2.0             | 1.5          | 3.5          | -2.1             | 1.5          | 3.7          | 1.9              | 1.8               |
| M05-2X/MG3S              | -3.3             | 1.5          | 4.8          | -1.9             | 0.6          | 2.5          | -0.9             | 1.6          | 2.6          | -1.6             | 2.0          | 3.6          | 2.3              | 2.1               |
| ωB97X/ma-TZVP            | -0.9             | 2.6          | 3.5          | -1.6             | 2.0          | 3.6          | -2.7             | 2.6          | 5.2          | -2.4             | 2.7          | 5.1          | 2.9              | 2.8               |
| ωB97X/MG3S               | -1.6             | 2.7          | 4.3          | -1.6             | 1.8          | 3.5          | -2.7             | 2.6          | 5.3          | -2.4             | 2.7          | 5.2          | 3.0              | 2.9               |
| ωB97/ma-TZVP             | -0.3             | 4.2          | 4.6          | -1.7             | 3.2          | 4.9          | -3.4             | 3.5          | 6.8          | -3.0             | 3.6          | 6.7          | 3.8              | 3.8               |
| ωB97/MG3S                | -1.1             | 4.2          | 5.4          | -1.8             | 3.0          | 4.8          | -3.4             | 3.4          | 6.8          | -3.1             | 3.6          | 6.7          | 3.9              | 3.8               |

<sup>a</sup> The values in the first line are barrier heights and energies of reaction computed by CCSD(T)-F12a/jun-cc-pVTZ, and the other lines are differences from CCSD(T)-F12a/jun-cc-pVTZ. The density functionals are listed by an order of ascending mean unsigned deviation (MUD).

<sup>b</sup> MUD: mean unsigned deviation for four reactions of each molecule.

<sup>c</sup> MMUD: mean MUD for the total eight reactions.

**Table S2** The barrier heights (the zero point energy included,  $\Delta E_f$ : forward barrier height,  $\Delta E_r$ : backward barrier height) and enthalpies of reaction at 0 K ( $\Delta H_r$ ) of hydrogen addition reactions computed using M06-2X/ma-TZVP method for geometry optimization and energy calculation. The zero point energies (ZPEs) were calculated using scaled harmonic frequencies with a scale factor of 0.972. (in kcal/mol)

| M06-2X/ma-TZVP   |              |      |
|------------------|--------------|------|
|                  | $\Delta H_r$ | -7.4 |
| R <sub>1,1</sub> | $\Delta E_f$ | 13.3 |
|                  | $\Delta E_r$ | 20.7 |
| R <sub>2,1</sub> | $\Delta H_r$ | 0.1  |

|                  |              |       |
|------------------|--------------|-------|
|                  | $\Delta E_f$ | 10.7  |
|                  | $\Delta E_r$ | 10.6  |
|                  | $\Delta H_r$ | -33.5 |
| R <sub>3,1</sub> | $\Delta E_f$ | 4.3   |
|                  | $\Delta E_r$ | 37.9  |
|                  | $\Delta H_r$ | -36.7 |
| R <sub>4,1</sub> | $\Delta E_f$ | 3.1   |
|                  | $\Delta E_r$ | 39.8  |
|                  | $\Delta H_r$ | -19.4 |
| R <sub>5,1</sub> | $\Delta E_f$ | 11.2  |
|                  | $\Delta E_r$ | 30.6  |
|                  | $\Delta H_r$ | 3.6   |
| R <sub>6,1</sub> | $\Delta E_f$ | 11.9  |
|                  | $\Delta E_r$ | 8.3   |
|                  | $\Delta H_r$ | -33.8 |
| R <sub>7,1</sub> | $\Delta E_f$ | 4.1   |
|                  | $\Delta E_r$ | 37.9  |
|                  | $\Delta H_r$ | -38.2 |
| R <sub>8,1</sub> | $\Delta E_f$ | 3.8   |
|                  | $\Delta E_r$ | 42.0  |

**Table S3** The geometries and Cartesian coordinates of reactants, transition states, intermediates and products of hydrogen addition reactions for methyl 3-butenate and methyl 2-butenate at the M06-2X/ma-TZVP level with integral grid of 99974 (coordinate units: Angstrom)

---

Reactants

---

Methyl 3-butenate

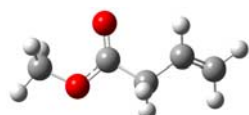

Coordinates

|   |             |             |             |
|---|-------------|-------------|-------------|
| C | 0.79398300  | -0.59662900 | 0.44161700  |
| C | 2.00924600  | 0.24475000  | 0.21128200  |
| H | 0.82932500  | -1.52666600 | -0.12555300 |
| H | 0.71765300  | -0.87879200 | 1.49798400  |
| C | 3.07548000  | -0.17027900 | -0.45304300 |
| H | 1.97685400  | 1.24659000  | 0.62469000  |
| H | 3.93882400  | 0.46750900  | -0.58762700 |
| H | 3.12208100  | -1.16262800 | -0.88728700 |
| C | -0.48827700 | 0.13411000  | 0.11894300  |
| O | -0.60310900 | 1.32234800  | 0.00495500  |
| O | -1.51474700 | -0.71954000 | 0.00327000  |
| C | -2.78178300 | -0.11764600 | -0.25648100 |
| H | -2.75069300 | 0.43973300  | -1.19138600 |
| H | -3.05076700 | 0.56171500  | 0.55105000  |
| H | -3.49232700 | -0.93576100 | -0.32158200 |

---

---

---

Methyl 2-butenoate

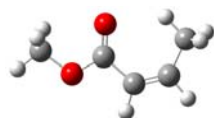

Coordinates

|   |             |             |             |
|---|-------------|-------------|-------------|
| C | 1.99061800  | 0.68607300  | -0.00011400 |
| C | 0.69346000  | 0.98854600  | 0.00005300  |
| H | 0.38121300  | 2.02420900  | 0.00000400  |
| C | -0.41392500 | 0.00761700  | 0.00033800  |
| O | -0.33037700 | -1.19339100 | 0.00011200  |
| O | -1.59702000 | 0.64766900  | 0.00002000  |
| C | -2.74397900 | -0.19606100 | -0.00016800 |
| H | -3.60295900 | 0.46801100  | -0.00040700 |
| H | -2.74907600 | -0.82995500 | 0.88563300  |
| H | -2.74869100 | -0.83009200 | -0.88587200 |
| H | 2.67682000  | 1.52897500  | -0.00027900 |
| C | 2.63664600  | -0.65817900 | -0.00008900 |
| H | 3.28497100  | -0.74839000 | -0.87515100 |
| H | 1.91474500  | -1.46673800 | 0.00009000  |
| H | 3.28522900  | -0.74823100 | 0.87479900  |

---

---

Transition state

TS<sub>1,1</sub>

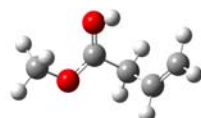

Coordinates

|   |             |             |             |
|---|-------------|-------------|-------------|
| C | -0.84981100 | -0.60652000 | 0.90541300  |
| C | -1.72435800 | -0.63186400 | -0.32350000 |
| H | -1.31792400 | -0.02390900 | 1.69669700  |
| H | -0.62585600 | -1.61047500 | 1.26099100  |
| C | -2.57833900 | 0.33653600  | -0.62111100 |
| H | -1.55367200 | -1.44452600 | -1.02120600 |
| H | -3.14114900 | 0.32789100  | -1.54528000 |
| H | -2.74586000 | 1.16707000  | 0.05492700  |
| C | 0.41156700  | 0.09358000  | 0.49334100  |
| O | 0.51368400  | 1.32317300  | 0.44350700  |
| O | 1.32339000  | -0.71948100 | -0.04694000 |
| C | 2.48436000  | -0.08696200 | -0.58558300 |
| H | 3.00501400  | 0.46887100  | 0.19371000  |
| H | 2.20807000  | 0.59489900  | -1.38765900 |
| H | 3.10913500  | -0.88944800 | -0.96497900 |
| H | -0.09486700 | 1.95147500  | -0.67109200 |

---

---

---

TS<sub>2,1</sub>

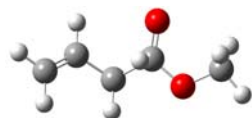

Coordinates

|   |             |             |             |
|---|-------------|-------------|-------------|
| C | -0.80790800 | -0.51659700 | -0.55728200 |
| C | -2.02622600 | 0.26854000  | -0.19117700 |
| H | -0.85517200 | -1.53820700 | -0.18371600 |
| H | -0.69274400 | -0.56516500 | -1.64601600 |
| C | -3.06638100 | -0.24520300 | 0.44607200  |
| H | -2.01454300 | 1.31721300  | -0.46755600 |
| H | -3.92964200 | 0.35766000  | 0.69456000  |
| H | -3.09082700 | -1.28861000 | 0.73982700  |
| C | 0.47270100  | 0.14564600  | -0.06158900 |
| O | 0.65126300  | 1.35990000  | -0.05945400 |
| O | 1.49934700  | -0.73914300 | -0.06278000 |
| C | 2.76815100  | -0.18232400 | 0.25669100  |
| H | 2.73569800  | 0.28388500  | 1.24343900  |
| H | 3.05519400  | 0.56905200  | -0.47743200 |
| H | 3.46983000  | -1.01088900 | 0.25329000  |
| H | 0.07529700  | 0.08862400  | 1.46517900  |

---

TS<sub>3,1</sub>

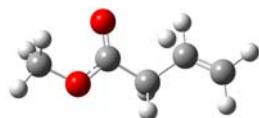

Coordinates

|   |             |             |             |
|---|-------------|-------------|-------------|
| C | -0.78016300 | -0.52221400 | 0.47878100  |
| C | -1.95268400 | 0.28594400  | -0.00415700 |
| H | -0.82966500 | -0.61185300 | 1.56990300  |
| H | -0.78671400 | -1.53143700 | 0.07116000  |
| C | -3.15226000 | -0.25024400 | -0.26262100 |
| H | -1.83588600 | 1.36238600  | 0.06060900  |
| H | -3.99814500 | 0.37117800  | -0.52199800 |
| H | -3.30405500 | -1.32298200 | -0.26446400 |
| C | 0.54004600  | 0.14661300  | 0.18318700  |
| O | 0.72064700  | 1.33285600  | 0.17970700  |
| O | 1.50962700  | -0.74828300 | -0.03666400 |
| C | 2.80357300  | -0.19647500 | -0.27735600 |
| H | 3.12964700  | 0.39018600  | 0.58018500  |
| H | 2.78084900  | 0.44457700  | -1.15712400 |
| H | 3.46334300  | -1.04361800 | -0.43632200 |
| H | -1.21264100 | 0.48324400  | -1.75330900 |

---

TS<sub>4,1</sub>

---

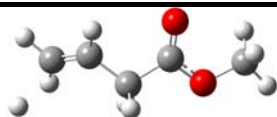

Coordinates

|   |             |             |             |
|---|-------------|-------------|-------------|
| C | -0.73879200 | -0.57223800 | 0.34390900  |
| C | -1.92207000 | 0.31352400  | 0.13546000  |
| H | -0.70524800 | -0.92027800 | 1.38404300  |
| H | -0.78251800 | -1.46729600 | -0.27655900 |
| C | -3.03876900 | -0.08314100 | -0.47917000 |
| H | -1.85186000 | 1.31096900  | 0.55329200  |
| H | -3.86745700 | 0.59563400  | -0.62876200 |
| H | -3.10211600 | -1.05043400 | -0.96400900 |
| C | 0.57302500  | 0.13827300  | 0.10519600  |
| O | 0.72141600  | 1.32728100  | 0.05799500  |
| O | 1.57912400  | -0.73653200 | -0.01992900 |
| C | 2.87071800  | -0.15859100 | -0.20416200 |
| H | 3.12817100  | 0.47074400  | 0.64644500  |
| H | 2.88800600  | 0.44602800  | -1.10956300 |
| H | 3.56071900  | -0.99247600 | -0.28678000 |
| H | -4.13668500 | -0.94584400 | 0.96997000  |

---

TS<sub>4,2</sub>

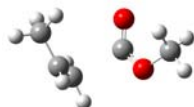

Coordinates

|   |           |           |           |
|---|-----------|-----------|-----------|
| C | -1.283616 | -0.983607 | -0.756255 |
| C | -1.812897 | -0.584553 | 0.418008  |
| H | -0.830194 | -1.960760 | -0.858537 |
| H | -1.513637 | -0.449690 | -1.670506 |
| C | -2.512147 | 0.717573  | 0.612247  |
| H | -1.650051 | -1.196328 | 1.299806  |
| H | -1.922932 | 1.378430  | 1.255530  |
| H | -2.666414 | 1.226956  | -0.338344 |
| C | 0.692135  | 0.073893  | -0.656278 |
| O | 0.737139  | 1.250579  | -0.796030 |
| O | 1.494262  | -0.688406 | 0.069559  |
| C | 2.549326  | 0.011639  | 0.756772  |
| H | 2.121631  | 0.745072  | 1.438530  |
| H | 3.191261  | 0.515844  | 0.036728  |
| H | 3.102058  | -0.746801 | 1.301556  |
| H | -3.479737 | 0.580217  | 1.100034  |

---

TS<sub>5,1</sub>

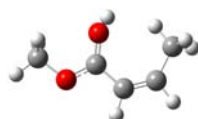

---

Coordinates

|   |             |             |             |
|---|-------------|-------------|-------------|
| C | 1.98638700  | -0.70994100 | 0.04242600  |
| C | 0.68611000  | -1.02366100 | 0.03073400  |
| H | 0.38761500  | -2.06046700 | 0.11194600  |
| C | -0.41638400 | -0.07719400 | -0.04775000 |
| O | -0.31666600 | 1.15584000  | -0.06415500 |
| O | -1.61258300 | -0.67651200 | 0.02315700  |
| C | -2.74643700 | 0.18356100  | -0.04201000 |
| H | -3.61407900 | -0.46691900 | 0.00842500  |
| H | -2.74208700 | 0.74475300  | -0.97625200 |
| H | -2.74470500 | 0.88286800  | 0.79224500  |
| H | 2.67031600  | -1.54844100 | 0.14094000  |
| C | 2.64455300  | 0.62361200  | -0.08569000 |
| H | 3.15195900  | 0.87456500  | 0.84896700  |
| H | 1.94731100  | 1.41853100  | -0.32577600 |
| H | 3.41925700  | 0.56938200  | -0.85417400 |
| H | 0.03303900  | 1.77284200  | 1.19540300  |

---

TS<sub>6,1</sub>

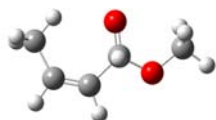

Coordinates

|   |             |             |             |
|---|-------------|-------------|-------------|
| C | 2.00213800  | 0.68668400  | -0.05258600 |
| C | 0.71144300  | 0.99140400  | 0.06885000  |
| H | 0.39329200  | 2.02431000  | 0.11698000  |
| C | -0.41663600 | 0.00998900  | 0.14182200  |
| O | -0.32213100 | -1.21552800 | 0.09843100  |
| O | -1.58947000 | 0.64647400  | -0.13554600 |
| C | -2.73419700 | -0.19296200 | -0.13029700 |
| H | -3.58455900 | 0.45614300  | -0.31710100 |
| H | -2.83768000 | -0.68369900 | 0.84009200  |
| H | -2.65767300 | -0.95730300 | -0.90220100 |
| H | 2.68422900  | 1.53071100  | -0.10817900 |
| C | 2.64030600  | -0.65969600 | -0.12545400 |
| H | 3.29352300  | -0.70889800 | -0.99911300 |
| H | 1.91158200  | -1.46174700 | -0.16645000 |
| H | 3.28008900  | -0.80721100 | 0.74900200  |
| H | -0.40832000 | 0.14762500  | 1.66987800  |

---

TS<sub>7,1</sub>

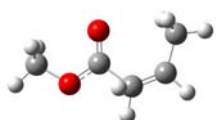

Coordinates

|   |             |            |             |
|---|-------------|------------|-------------|
| C | -1.99079400 | 0.65845300 | -0.12477200 |
| C | -0.69462300 | 1.00760300 | -0.02095800 |
| H | -0.39441500 | 2.03937200 | -0.14352500 |
| C | 0.40743000  | 0.01561700 | 0.01028300  |

---



---

|   |             |             |             |
|---|-------------|-------------|-------------|
| O | 0.28388400  | -1.17649400 | 0.11394200  |
| O | 1.59791600  | 0.62335300  | -0.09995700 |
| C | 2.72786200  | -0.24329100 | -0.05828600 |
| H | 3.59883900  | 0.39813000  | -0.15011700 |
| H | 2.68882700  | -0.95780500 | -0.87932200 |
| H | 2.75013300  | -0.78904800 | 0.88407300  |
| H | -2.70098600 | 1.47165000  | -0.22907100 |
| C | -2.54878600 | -0.72359800 | -0.04561900 |
| H | -2.36728900 | -1.14742000 | 0.94543700  |
| H | -2.05379100 | -1.39293800 | -0.74874400 |
| H | -3.61966600 | -0.72064400 | -0.23562100 |
| H | -0.36259200 | 1.23512100  | 1.88112900  |

---

TS<sub>7,2</sub>

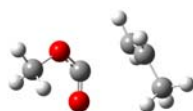

Coordinates

|   |             |             |             |
|---|-------------|-------------|-------------|
| C | 1.81318200  | 0.58446600  | 0.41818500  |
| C | 1.28352500  | 0.98405800  | -0.75570700 |
| H | 0.82995100  | 1.96120700  | -0.85739500 |
| C | -0.69214200 | -0.07376700 | -0.65608100 |
| O | -0.73689100 | -1.25045200 | -0.79590300 |
| O | -1.49463500 | 0.68834600  | 0.06953500  |
| C | -2.54971000 | -0.01194300 | 0.75649200  |
| H | -3.10296600 | 0.74641500  | 1.30085800  |
| H | -2.12200100 | -0.74502900 | 1.43861500  |
| H | -3.19114300 | -0.51658700 | 0.03630900  |
| H | 1.65050100  | 1.19581400  | 1.30031100  |
| C | 2.51252100  | -0.71772600 | 0.61169900  |
| H | 2.66697800  | -1.22649700 | -0.33918400 |
| H | 1.92324400  | -1.37904500 | 1.25445600  |
| H | 3.48001300  | -0.58060300 | 1.09973800  |
| H | 1.51337700  | 0.45064000  | -1.67029300 |

---

TS<sub>8,1</sub>

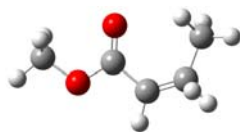

Coordinates

|   |             |             |             |
|---|-------------|-------------|-------------|
| C | -1.96016500 | 0.64575800  | -0.07982100 |
| C | -0.65968000 | 0.98621400  | -0.12783300 |
| H | -0.37148300 | 2.02511500  | -0.21130900 |
| C | 0.44597600  | 0.01806300  | -0.03712100 |
| O | 0.34744200  | -1.18211100 | 0.01180700  |
| O | 1.63229800  | 0.65098800  | -0.02222300 |
| C | 2.77208900  | -0.19895000 | 0.05464400  |
| H | 3.63575900  | 0.45886800  | 0.05088600  |
| H | 2.80007500  | -0.87446100 | -0.79943300 |
| H | 2.74398500  | -0.78993100 | 0.96918500  |

---

|   |             |             |             |
|---|-------------|-------------|-------------|
| H | -2.67063400 | 1.45308900  | -0.22902200 |
| C | -2.53201000 | -0.73945500 | -0.04060700 |
| H | -3.57056900 | -0.71022400 | 0.28407100  |
| H | -1.95920300 | -1.39529000 | 0.60841900  |
| H | -2.49842000 | -1.17402300 | -1.04294900 |
| H | -2.34469300 | 0.98606500  | 1.83790300  |

TS<sub>8,2</sub>

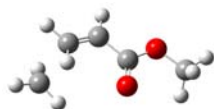

Coordinates

|   |             |             |             |
|---|-------------|-------------|-------------|
| C | -1.79006800 | 0.74466000  | 0.60163800  |
| C | -0.61783700 | 0.99493000  | -0.01505100 |
| H | -0.48444500 | 1.81520100  | -0.70644600 |
| C | 0.51889500  | 0.08883600  | 0.19356400  |
| O | 0.49102400  | -0.92866700 | 0.84130500  |
| O | 1.62292800  | 0.52102300  | -0.44086500 |
| C | 2.77245300  | -0.30433300 | -0.28693300 |
| H | 3.56524300  | 0.17901000  | -0.84981000 |
| H | 2.57876800  | -1.30269600 | -0.67736500 |
| H | 3.04375100  | -0.38570900 | 0.76488800  |
| H | -2.61480000 | 1.44004700  | 0.52911500  |
| C | -2.91651400 | -0.80938900 | -0.70467600 |
| H | -3.82243900 | -0.89493800 | -0.12245400 |
| H | -2.17990000 | -1.59235400 | -0.60931300 |
| H | -2.97095500 | -0.27791700 | -1.64213800 |
| H | -1.82841800 | -0.00771200 | 1.37875200  |

Intermediates

Int1

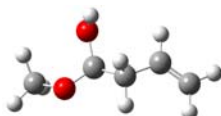

Coordinates

|   |             |             |             |
|---|-------------|-------------|-------------|
| C | 0.82304100  | -0.31877800 | 0.62383200  |
| C | 2.03106700  | 0.26912200  | -0.04465700 |
| H | 0.87943500  | -1.40643900 | 0.63806800  |
| H | 0.78858600  | 0.01444000  | 1.67682200  |
| C | 3.09198300  | -0.43070900 | -0.41280900 |
| H | 2.00362600  | 1.33912900  | -0.22805900 |
| H | 3.94183400  | 0.04006100  | -0.88896900 |
| H | 3.14521200  | -1.50157500 | -0.25275000 |
| C | -0.45231500 | 0.09168100  | -0.03772300 |
| O | -0.74112600 | 1.42966500  | -0.05601400 |
| O | -1.49146100 | -0.73074200 | 0.25291400  |
| C | -2.71354900 | -0.42087800 | -0.39873200 |
| H | -2.56485600 | -0.38154800 | -1.48010200 |
| H | -3.10850900 | 0.53542900  | -0.05713700 |

---

|   |             |             |             |
|---|-------------|-------------|-------------|
| H | -3.40576600 | -1.22019300 | -0.14830900 |
| H | -0.50023100 | 1.84669500  | 0.78577100  |

---

Int2

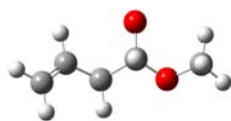

Coordinates

|   |             |             |             |
|---|-------------|-------------|-------------|
| C | -0.79707100 | -0.38477100 | -0.60391500 |
| C | -2.04827100 | 0.26814800  | -0.11311100 |
| H | -0.82856200 | -1.46453000 | -0.46271400 |
| H | -0.63614000 | -0.18620300 | -1.66606500 |
| C | -3.05866100 | -0.39086500 | 0.43331000  |
| H | -2.10035100 | 1.34658800  | -0.22006000 |
| H | -3.94984100 | 0.12049100  | 0.77246100  |
| H | -3.03071300 | -1.46801500 | 0.55473800  |
| C | 0.46054400  | 0.13020000  | 0.12857800  |
| O | 0.60092900  | 1.45462300  | -0.05741900 |
| O | 1.54066100  | -0.64361300 | -0.29663900 |
| C | 2.75572900  | -0.31142000 | 0.34172100  |
| H | 2.67217600  | -0.44094500 | 1.42691900  |
| H | 3.04602700  | 0.71857400  | 0.12608200  |
| H | 3.51352700  | -0.99006800 | -0.04145700 |
| H | 0.30753000  | 0.00828700  | 1.22305700  |

---

Int3

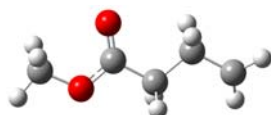

Coordinates

|   |             |             |             |
|---|-------------|-------------|-------------|
| C | 0.77137700  | -0.57045700 | 0.02491800  |
| C | 1.94441200  | 0.39889900  | 0.00897500  |
| H | 0.80770300  | -1.24739100 | -0.83272100 |
| H | 0.79775900  | -1.20863900 | 0.91140300  |
| C | 3.25424500  | -0.29997200 | 0.00438200  |
| H | 1.84570100  | 1.05004600  | -0.87037700 |
| H | 4.15614600  | 0.21932500  | 0.29137200  |
| H | 3.35772400  | -1.27311900 | -0.45548200 |
| C | -0.56119900 | 0.13069700  | -0.00123200 |
| O | -0.72311700 | 1.31947100  | -0.03765500 |
| O | -1.57545600 | -0.74663900 | 0.02209400  |
| C | -2.88032000 | -0.17237100 | 0.00091600  |
| H | -3.57399000 | -1.00716000 | 0.02375100  |
| H | -3.02546400 | 0.47082500  | 0.86770100  |
| H | -3.02010000 | 0.41804800  | -0.90349300 |
| H | 1.87202500  | 1.07463800  | 0.86458900  |

---

---

Int4

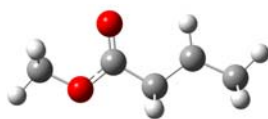

Coordinates

|   |             |             |             |
|---|-------------|-------------|-------------|
| C | -0.74042500 | -0.55905300 | 0.00014000  |
| C | -1.90107300 | 0.36257500  | -0.00026300 |
| H | -0.75251200 | -1.23402400 | 0.86701500  |
| H | -0.75248900 | -1.23473300 | -0.86616100 |
| C | -3.27788600 | -0.19035500 | -0.00001200 |
| H | -1.71429600 | 1.42527900  | 0.00016100  |
| H | -4.02975100 | 0.59619400  | -0.00147000 |
| H | -3.45725700 | -0.82725800 | -0.87499400 |
| C | 0.59466000  | 0.14402500  | -0.00005200 |
| O | 0.76423000  | 1.33107900  | 0.00006900  |
| O | 1.60285200  | -0.74026900 | -0.00010800 |
| C | 2.91058700  | -0.17374500 | 0.00000800  |
| H | 3.05648200  | 0.44278700  | 0.88566500  |
| H | 3.05692900  | 0.44207400  | -0.88607700 |
| H | 3.59910000  | -1.01284900 | 0.00050400  |
| H | -3.45803800 | -0.82463100 | 0.87674700  |

---

Int5

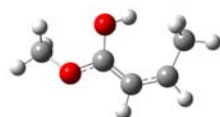

Coordinates

|   |             |             |             |
|---|-------------|-------------|-------------|
| C | 2.00677800  | -0.73595200 | -0.09324300 |
| C | 0.65063800  | -1.02170800 | -0.03464700 |
| H | 0.34618900  | -2.05948600 | -0.07472000 |
| C | -0.40825000 | -0.15037500 | 0.07654000  |
| O | -0.34500800 | 1.20000000  | 0.08022800  |
| O | -1.64997900 | -0.62002800 | 0.26193700  |
| C | -2.72585300 | 0.18966900  | -0.19543000 |
| H | -3.62200900 | -0.40989300 | -0.06394700 |
| H | -2.59696200 | 0.43915400  | -1.25052900 |
| H | -2.80260100 | 1.10697600  | 0.38609700  |
| H | 2.67463300  | -1.57630700 | -0.21578800 |
| C | 2.63451500  | 0.62147600  | 0.00221700  |
| H | 2.32970900  | 1.16203800  | 0.90551400  |
| H | 2.41275000  | 1.25956000  | -0.86534600 |
| H | 3.71928500  | 0.54119400  | 0.04029300  |
| H | 0.55193100  | 1.47833100  | -0.13151200 |

---

Int6

---

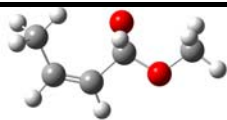

Coordinates

|   |             |             |             |
|---|-------------|-------------|-------------|
| C | -2.00574000 | -0.66816000 | -0.07880100 |
| C | -0.71599000 | -0.91404800 | -0.25146800 |
| H | -0.35658300 | -1.84934300 | -0.66040400 |
| C | 0.39963200  | 0.06904200  | 0.07033800  |
| O | 0.31264800  | 1.08086300  | -0.82690500 |
| O | 1.60162900  | -0.63999900 | 0.03465800  |
| C | 2.72118800  | 0.15693800  | 0.35444900  |
| H | 3.59403100  | -0.49042400 | 0.32784100  |
| H | 2.62060200  | 0.58423300  | 1.35899000  |
| H | 2.84743800  | 0.96650900  | -0.36806600 |
| H | -2.70296400 | -1.45800100 | -0.34110700 |
| C | -2.60616100 | 0.59624100  | 0.44418500  |
| H | -3.22578000 | 1.06248700  | -0.32482500 |
| H | -1.85145300 | 1.32076700  | 0.74207000  |
| H | -3.25726100 | 0.38572400  | 1.29482600  |
| H | 0.26017700  | 0.51106400  | 1.07642600  |

---

Int7

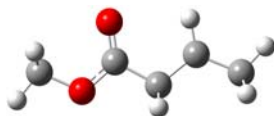

Coordinates

|   |             |             |             |
|---|-------------|-------------|-------------|
| C | 1.90107000  | 0.36256100  | -0.00008600 |
| C | 0.74042200  | -0.55906400 | 0.00002000  |
| H | 0.75247100  | -1.23447500 | -0.86650100 |
| C | -0.59466000 | 0.14402300  | -0.00000700 |
| O | -0.76422700 | 1.33107700  | 0.00003600  |
| O | -1.60285600 | -0.74026800 | -0.00002400 |
| C | -2.91058800 | -0.17373800 | -0.00000100 |
| H | -3.59910700 | -1.01283700 | -0.00002900 |
| H | -3.05670500 | 0.44247100  | -0.88584900 |
| H | -3.05670200 | 0.44240700  | 0.88589400  |
| H | 1.71429100  | 1.42526600  | -0.00010700 |
| C | 3.27789300  | -0.19034500 | 0.00001900  |
| H | 3.45767900  | -0.82607700 | -0.87574400 |
| H | 3.45766200  | -0.82578200 | 0.87600100  |
| H | 4.02973800  | 0.59622600  | -0.00010500 |
| H | 0.75250900  | -1.23430400 | 0.86667700  |

---

Int8

---

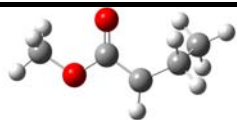

Coordinates

|   |             |             |             |
|---|-------------|-------------|-------------|
| C | 2.00273400  | -0.26779800 | 0.54397300  |
| C | 0.68028700  | -0.84971600 | 0.21652000  |
| H | 0.56798500  | -1.88759300 | -0.06392900 |
| C | -0.49098900 | -0.00035000 | 0.16745400  |
| O | -0.49187200 | 1.18579600  | 0.41404500  |
| O | -1.60283000 | -0.67625300 | -0.18793100 |
| C | -2.78888000 | 0.10696200  | -0.25201600 |
| H | -3.58175600 | -0.57456900 | -0.54510800 |
| H | -2.67950400 | 0.90518100  | -0.98547300 |
| H | -3.00524000 | 0.55127200  | 0.71898300  |
| H | 2.65064100  | -1.03542900 | 0.96925100  |
| C | 2.66932700  | 0.33882300  | -0.70246900 |
| H | 3.64157400  | 0.75939400  | -0.44586200 |
| H | 2.04503600  | 1.13397600  | -1.10907700 |
| H | 2.81496800  | -0.41707500 | -1.47479900 |
| H | 1.86903500  | 0.52097400  | 1.28633700  |

---

Products

---

$C_3H_6$

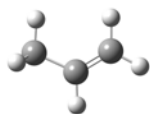

Coordinates

|   |             |             |             |
|---|-------------|-------------|-------------|
| C | 0.13442600  | -0.45597500 | -0.00001100 |
| C | -1.22733700 | 0.16252100  | -0.00000800 |
| H | 0.16985400  | -1.54191300 | 0.00002300  |
| H | -1.79710800 | -0.15123400 | 0.87734800  |
| H | -1.16519600 | 1.25047600  | -0.00003400 |
| H | -1.79717300 | -0.15131000 | -0.87723400 |
| C | 1.27235900  | 0.22147700  | -0.00001100 |
| H | 2.23122500  | -0.27993500 | 0.00004700  |
| H | 1.28170900  | 1.30577300  | 0.00002700  |

---

$C_2H_3O_2$

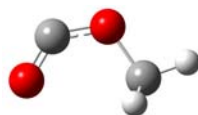

Coordinates

|   |             |             |             |
|---|-------------|-------------|-------------|
| C | -0.81298200 | 0.50872200  | 0.00002800  |
| O | -1.41436200 | -0.50609700 | 0.00012200  |
| O | 0.47568100  | 0.73336800  | -0.00007000 |

---

---

|   |            |             |             |
|---|------------|-------------|-------------|
| C | 1.30864200 | -0.45033000 | -0.00006600 |
| H | 1.10190300 | -1.03974700 | -0.89107700 |
| H | 1.10235000 | -1.03941900 | 0.89126700  |
| H | 2.33123200 | -0.08935500 | -0.00038400 |

---

CH<sub>3</sub>

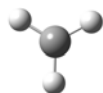

Coordinates

|   |             |             |             |
|---|-------------|-------------|-------------|
| C | 0.00000100  | 0.00002400  | 0.00034400  |
| H | -0.92524900 | 0.55167800  | -0.00068700 |
| H | 0.94047400  | 0.52530200  | -0.00068700 |
| H | -0.01523100 | -1.07712200 | -0.00068700 |

---

C<sub>4</sub>O<sub>2</sub>H<sub>6</sub>

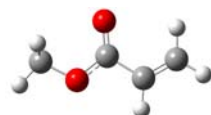

Coordinates

|   |             |             |             |
|---|-------------|-------------|-------------|
| C | 2.47265400  | -0.00168100 | -0.00022300 |
| C | 1.31738500  | -0.64764900 | 0.00018600  |
| H | 1.24654500  | -1.72704700 | 0.00060700  |
| C | 0.04037900  | 0.11035800  | 0.00010800  |
| O | -0.06125300 | 1.30742500  | 0.00018500  |
| O | -1.01257900 | -0.71949800 | -0.00005300 |
| C | -2.28752300 | -0.08240900 | -0.00013300 |
| H | -3.02119400 | -0.88248100 | -0.00012700 |
| H | -2.39808200 | 0.54115900  | -0.88616400 |
| H | -2.39815000 | 0.54124700  | 0.88582600  |
| H | 3.41671200  | -0.52945400 | -0.00017600 |
| H | 2.48745900  | 1.08144400  | -0.00065800 |

---

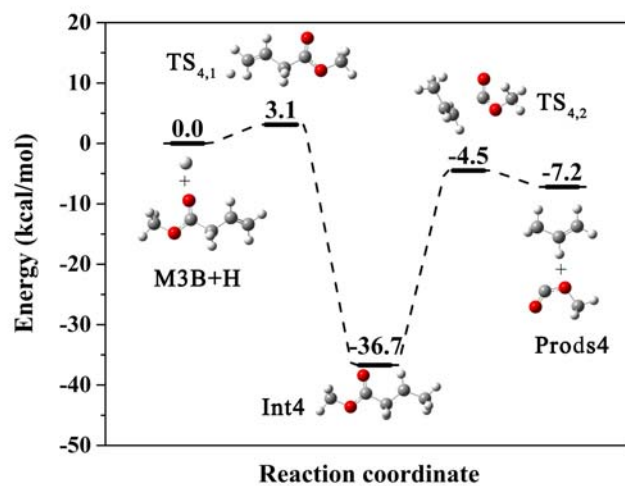

**Fig. S1** The potential energy surface for hydrogen addition reaction at site 4 by M06-2X/ma-TZVP.

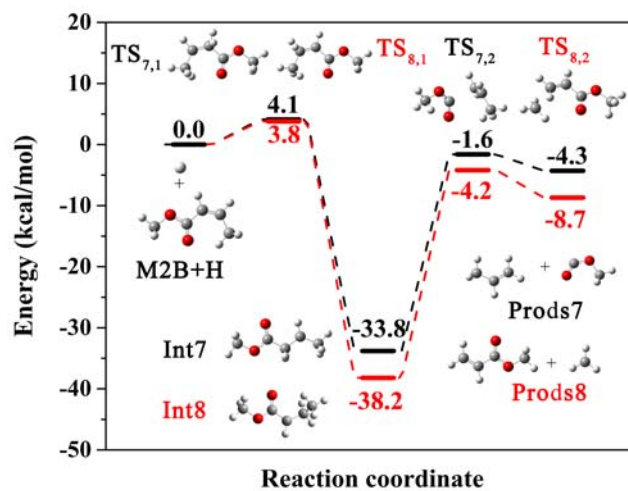

**Fig. S2** The potential energy surface for hydrogen addition reaction at site 7 (in black) and 8 (in red) by M06-2X/ma-TZVP.



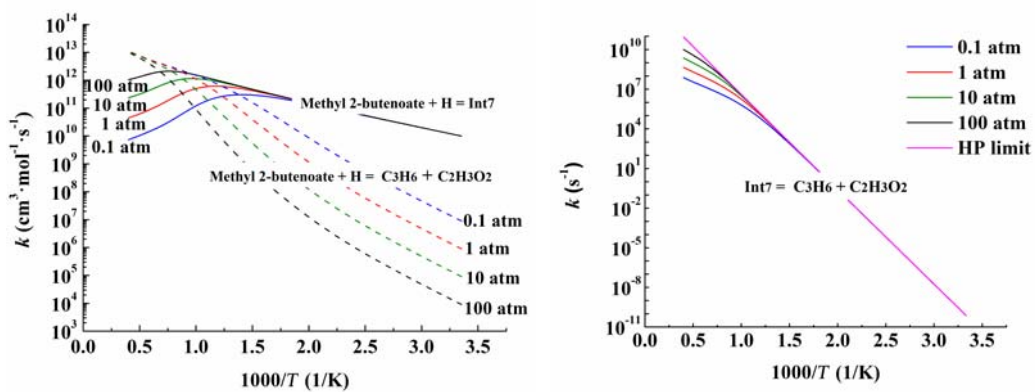

**Fig. S3** Pressure-dependent rate constants of (a)  $R_{7,1}$ ,  $R_{7,3}$ , and (b)  $R_{7,2}$  as functions of temperature.

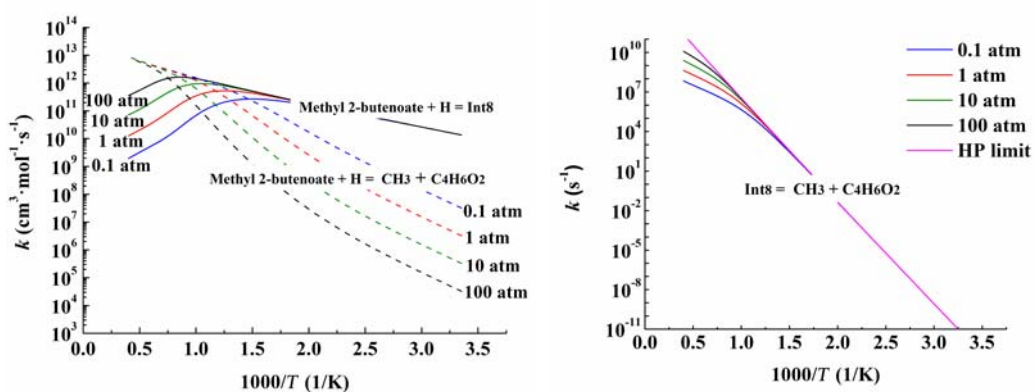

**Fig. S4** Pressure-dependent rate constants of (a)  $R_{8,1}$ ,  $R_{8,3}$ , and (b)  $R_{8,2}$  as functions of temperature.

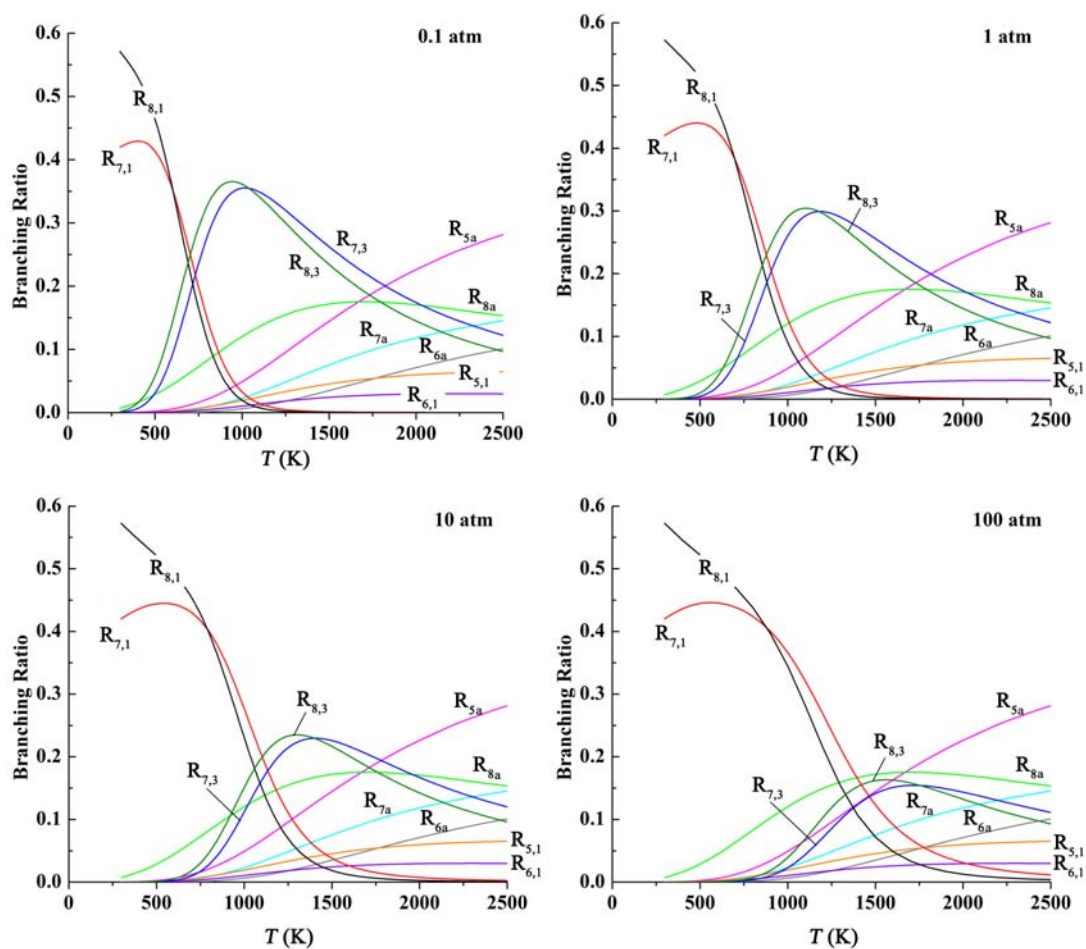

Fig. S5 Branching ratio of methyl 2-butenate + H reactions.

Table S4 The fitting parameters for the forward rate constants of hydrogen addition reactions to methyl butenoates and intermediates decomposition reactions

|           | $P$ (atm) | $B$ ( $\text{cm}^3 \cdot \text{mol}^{-1} \cdot \text{s}^{-1} \cdot \text{K}^{-n}$ ) | $n$   | $E$ ( $\text{kcal} \cdot \text{mol}^{-1}$ ) |
|-----------|-----------|-------------------------------------------------------------------------------------|-------|---------------------------------------------|
| $R_{1,1}$ | /         | $1.67\text{E}+10$                                                                   | 1.10  | 12.30                                       |
| $R_{2,1}$ | /         | $9.54\text{E}+09$                                                                   | 0.95  | 9.91                                        |
| $R_{3,1}$ | /         | $4.90\text{E}+09$                                                                   | 1.09  | 3.41                                        |
| $R_{4,1}$ | 0.1       | $7.48\text{E}+19$                                                                   | -2.54 | 2.47                                        |
|           | 1         | $1.45\text{E}+20$                                                                   | -2.46 | 3.07                                        |
|           | 10        | $3.99\text{E}+20$                                                                   | -2.42 | 4.01                                        |
|           | 100       | $5.32\text{E}+20$                                                                   | -2.27 | 5.37                                        |
| $R_{4,3}$ | 0.1       | $8.56\text{E}+11$                                                                   | 0.56  | 3.95                                        |
|           | 1         | $1.52\text{E}+14$                                                                   | -0.04 | 6.43                                        |
|           | 10        | $1.57\text{E}+18$                                                                   | -1.09 | 11.30                                       |
| $R_{5,1}$ | 100       | $1.25\text{E}+21$                                                                   | -1.82 | 16.70                                       |
| $R_{5,1}$ | /         | $4.42\text{E}+08$                                                                   | 1.47  | 9.95                                        |

|                  |                |                                                     |          |                                    |
|------------------|----------------|-----------------------------------------------------|----------|------------------------------------|
| R <sub>6,1</sub> | /              | 2.70E+10                                            | 0.88     | 11.10                              |
|                  | 0.1            | 1.68E+19                                            | -2.49    | 2.96                               |
| R <sub>7,1</sub> | 1              | 3.93E+19                                            | -2.43    | 3.56                               |
|                  | 10             | 8.74E+19                                            | -2.35    | 4.53                               |
|                  | 100            | 1.34E+20                                            | -2.21    | 6.10                               |
|                  | 0.1            | 3.03E+11                                            | 0.59     | 4.96                               |
| R <sub>7,3</sub> | 1              | 4.54E+13                                            | 0.01     | 7.40                               |
|                  | 10             | 6.12E+17                                            | -1.08    | 12.46                              |
|                  | 100            | 4.93E+20                                            | -1.80    | 17.91                              |
|                  | 0.1            | 1.49E+19                                            | -2.53    | 2.75                               |
| R <sub>8,1</sub> | 1              | 3.45E+19                                            | -2.48    | 3.24                               |
|                  | 10             | 6.76E+19                                            | -2.41    | 3.90                               |
|                  | 100            | 9.68E+19                                            | -2.28    | 4.92                               |
|                  | 0.1            | 9.57E+11                                            | 0.41     | 4.72                               |
| R <sub>8,3</sub> | 1              | 8.61E+13                                            | -0.12    | 6.83                               |
|                  | 10             | 4.24E+17                                            | -1.09    | 11.13                              |
|                  | 100            | 4.06E+20                                            | -1.85    | 15.97                              |
| <hr/>            |                |                                                     |          |                                    |
|                  | <i>P</i> (atm) | <i>B</i> (s <sup>-1</sup> ·K <sup>-<i>n</i></sup> ) | <i>n</i> | <i>E</i> (kcal·mol <sup>-1</sup> ) |
| R <sub>4,2</sub> | 0.1            | 2.92E+07                                            | 0.45     | 12.80                              |
|                  | 1              | 5.79E+10                                            | -0.20    | 16.50                              |
|                  | 10             | 6.32E+14                                            | -1.04    | 21.70                              |
|                  | 100            | 3.06E+17                                            | -1.52    | 26.40                              |
| R <sub>7,2</sub> | 0.1            | 2.66E+07                                            | 0.46     | 12.80                              |
|                  | 1              | 3.99E+10                                            | -0.15    | 16.34                              |
|                  | 10             | 9.90E+14                                            | -1.09    | 21.88                              |
|                  | 100            | 2.68E+17                                            | -1.51    | 26.41                              |
| R <sub>8,2</sub> | 0.1            | 7.75E+07                                            | 0.34     | 13.76                              |
|                  | 1              | 9.52E+10                                            | -0.25    | 17.19                              |
|                  | 10             | 1.70E+15                                            | -1.14    | 22.47                              |
|                  | 100            | 3.97E+17                                            | -1.53    | 26.65                              |

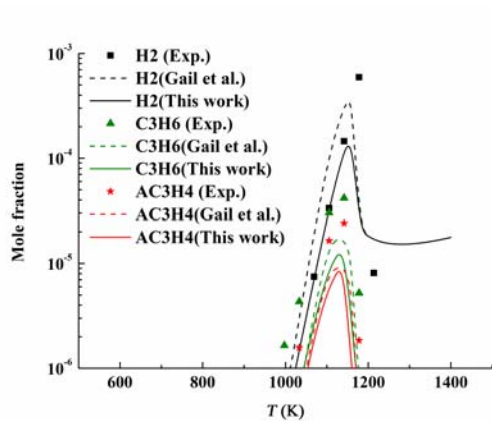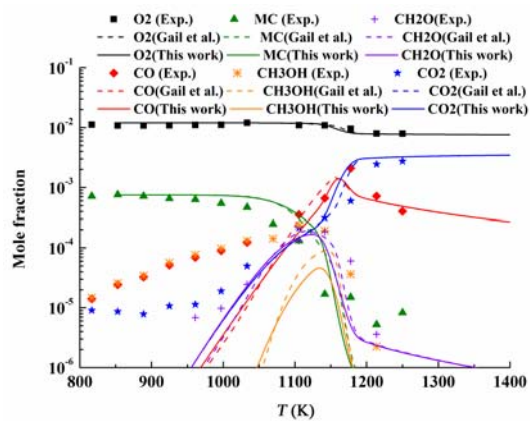

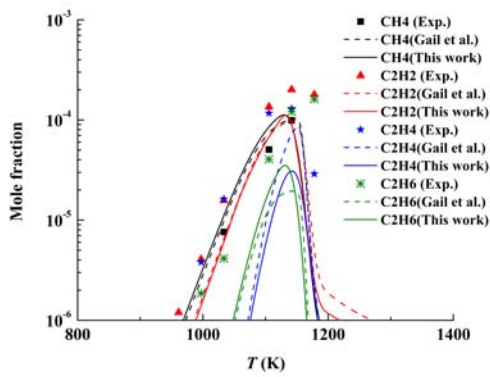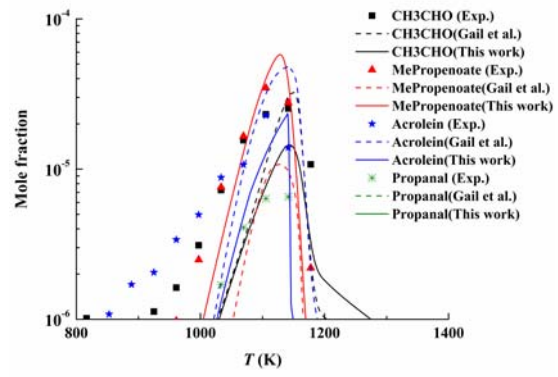

(a) JSR results and model predictions (dashed line: using the model of Gail et al.; solid line: using the model we modified) at  $\Phi=0.375$ .

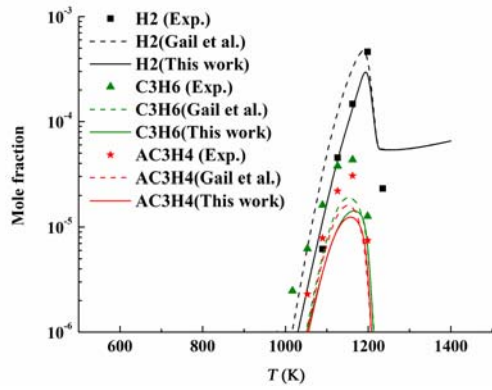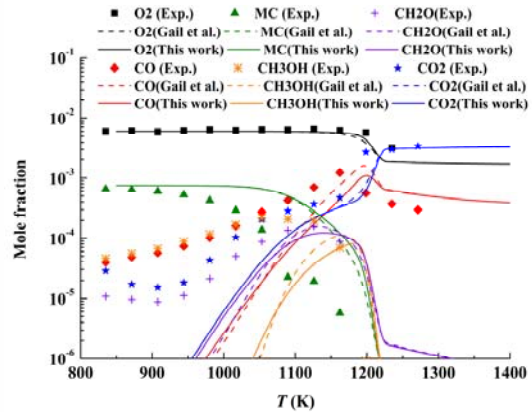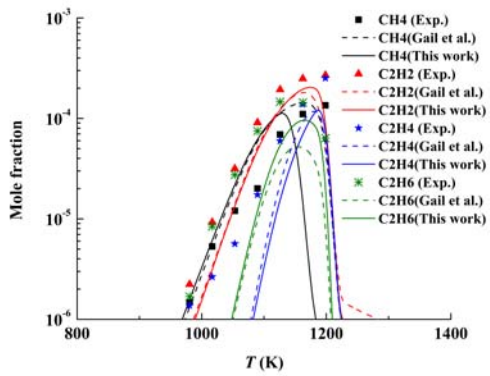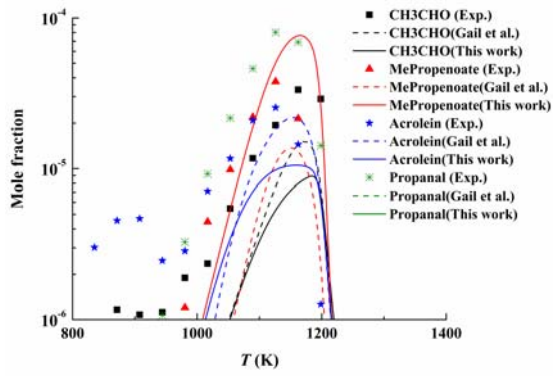

(b) JSR results and model predictions (dashed line: using the model of Gail et al.; solid line: using the model we modified) at  $\Phi=0.75$ .

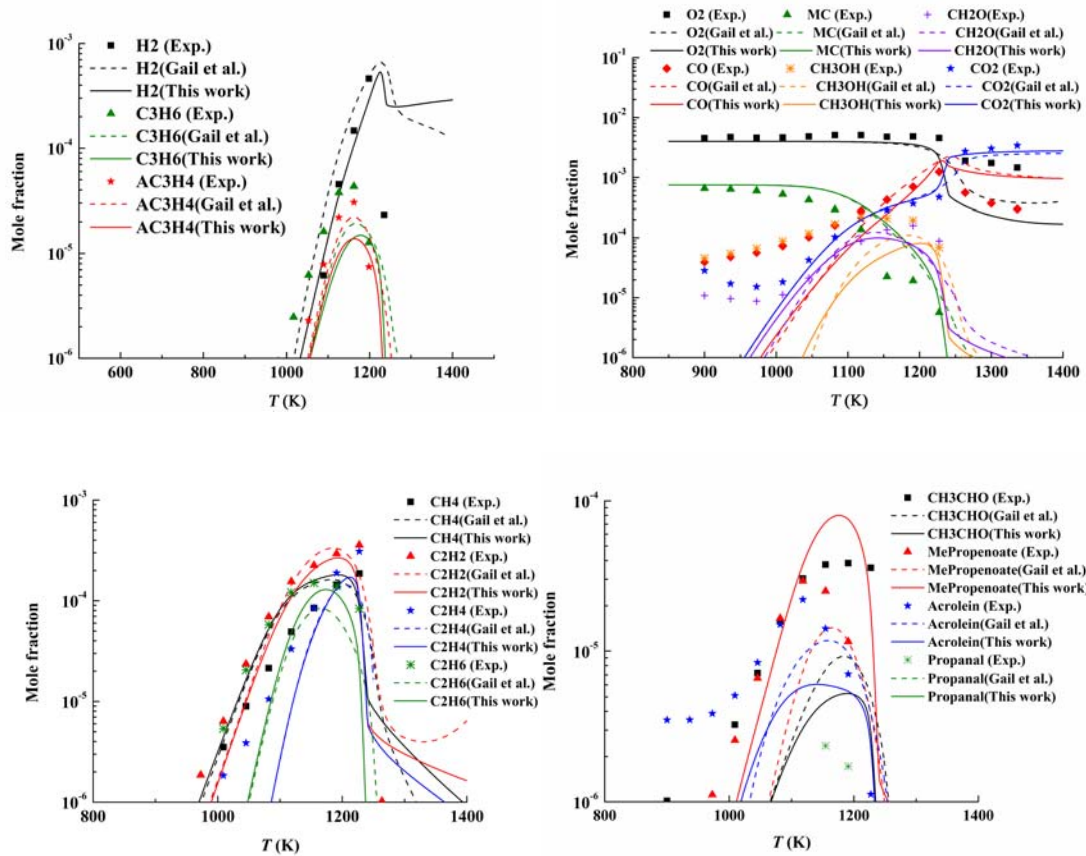

(c) JSR results and model predictions (dashed line: using the model of Gail et al.; solid line: using the model we modified) at  $\Phi=1.13$ .

**Fig. S6** JSR results and model predictions using different models.
